# Supplementary material for: XueBiJing Injection Versus Placebo for Critically Ill Patients With Severe Community-Acquired Pneumonia: A Randomized Controlled Trial
Source: PubMed Central journal article supplement — Crit Care Med. 2019 Aug 15;47(9):e735–43. doi: 10.1097/CCM.0000000000003842 (PMC6727951; doi:10.1097/ccm.0000000000003842), 2019-08-15
Supplement: ccm-47-e735-s001.pdf [file ccm-47-e735-s001.pdf]

## **Supplemental Content 1**

- 1. The action mechanism of XueBiJing**
- 2. The chemical composition of XueBiJing**

## The action mechanism of XueBiJing

XueBiJing, an intravenous preparation approved by the China Food and Drug Administration (China FDA) in 2004, has been incorporated into routine sepsis care in China. XueBiJing is prepared from a combination of *Carthamus tinctorius* flowers (Honghua in Chinese), *Paeonia lactiflora* roots (Chishao), *Ligusticum sinense* rhizomes (Chuanxiong), *Angelica sinensis* roots (Danggui), and *Salvia miltiorrhiza* roots (Danshen).

Pharmacological studies have shown that XueBiJing has an antagonistic effect on endotoxin, and an inhibitory effect on the uncontrolled release of endogenous inflammatory mediators produced by endotoxin-stimulated monocytes/macrophages. XueBiJing also can improve the coagulation disorder in DIC, increase the activity of superoxide dismutase, regulate hypersensitive or hyposensitive immune response, and prevent the development of organ dysfunction in acute insults. The main pharmacological effects of XueBiJing might be summarized as follows: (1) antagonizing endotoxin; (2) inhibiting inflammatory cytokines; (3) regulating immune function; (4) improving the balance of coagulation; and (5) protecting organ damage.

XueBiJing has pharmacological effects on antagonizing endotoxin, inhibiting inflammatory mediators, improving coagulation function, protecting endothelial cells, improving microcirculation, and regulating immune response. XueBiJing can obviously protect vascular endothelial cells by inhibiting the expression of early/late inflammatory cytokines, attenuate the interaction between inflammation system and coagulation system, and prevent the development of multiple organ dysfunction. Meanwhile, it markedly improves the hyperactive state of the natural immune response during the early stage of sepsis and alleviates the gradually aggravated immunosuppressive state, thereby comprehensively modulating systemic inflammation, coagulopathy and immune dissonance in the development of sepsis. Taken together, these results might suggest the integrated regulation of traditional

Chinese medicine on multi-components, multi-pathways, and multi-targets.

Markedly down-regulating synthesis and release of high mobility group box-1 protein (HMGB1), attenuating multi-organ pathological damage, and reducing the mortality rates of experimental animals <sup>[1]</sup>. Significantly promoting M2 polarization of macrophages, preventing the occurrence and development of MODS, and improving the survival rates of septic mice <sup>[2]</sup>. Enhancing the apoptosis of regulatory T cells and down-regulating inhibitory function of regulatory T cells on effector T cells <sup>[3]</sup>. Inhibiting the expression of PAR-1, decreasing the secretion of inflammatory cytokines, and improving coagulation dysfunction in sepsis <sup>[4]</sup>. Blocking the IRE1 $\alpha$ -XBP1 signaling pathway, down-regulating the expression of PDI, and further affecting tissue factor procoagulation activity of endothelial cells <sup>[5]</sup>.

## References

1. Yao YM, Sheng ZY, Huang LF. The effect of a novel cytokine, high mobility group box-1 protein, on the development of traumatic sepsis. *Chin J Integr Med* 2009; 15: 13-15.
2. Liu YC, Yao FH, Chai YF, Dong N, Sheng ZY, Yao YM. Xuebijing injection promotes M2 polarization of macrophages and improves survival rate in septic mice. *Evid-Based Compl Alt Med* 2015; 2015: 352642.
3. Ai YH, Yao YM, Dai XG. Effect of apoptosis of CD4+CD25+ regulatory T cells on proliferation as well as secretion of effector T cells and potential influence of Xuebijing injection in septic rats. *Chin J Surg* 2009; 47: 58-61.
4. Gui YG, Yao YM, Chai YF. A comparison study of interference effect between Xuebijing injection and activated protein C on lipopolysaccharide-induced monocyte tissue factor in rats. *Chin J TCM WM Crit Care*, 2009, 16(6): 326-329.
5. Chai Y, Li JY, Chai YF, Yao YM. The effect of Xuebijing injection on the procoagulation of tissue factor by inositol-requiring enzyme 1 $\alpha$  signaling pathway. *Chin J Emerg Med*, 2018, 27(2): 159-163.

## The chemical composition of XueBiJing

| ID                                                                               | Compound                                       | Molecular Mass | Molecular Formula                               | Average content level |
|----------------------------------------------------------------------------------|------------------------------------------------|----------------|-------------------------------------------------|-----------------------|
|                                                                                  |                                                | <i>Da</i>      |                                                 | <i>μmol/L</i>         |
| <i>Constituents originating from the component herbs Chuanxiong/Danggui only</i> |                                                |                |                                                 |                       |
| 1                                                                                | Senkyunolide I                                 | 224.1049       | C <sub>12</sub> H <sub>16</sub> O <sub>4</sub>  | 293.1±28.1            |
| 2                                                                                | Senkyunolide H                                 | 224.1049       | C <sub>12</sub> H <sub>16</sub> O <sub>4</sub>  | 64.8±6.3              |
| 3                                                                                | Senkyunolide G                                 | 208.1099       | C <sub>12</sub> H <sub>16</sub> O <sub>3</sub>  | 44.5±3.1              |
| 4                                                                                | Senkyunolide N                                 | 226.1205       | C <sub>12</sub> H <sub>18</sub> O <sub>4</sub>  | 40.8±5.2              |
| 5                                                                                | 3-Hydroxy-3- <i>n</i> -butylphthalide          | 206.0943       | C <sub>12</sub> H <sub>14</sub> O <sub>3</sub>  | 37.6±4.8              |
| 6                                                                                | Z-6,7-Epoxylicustilide                         | 206.0943       | C <sub>12</sub> H <sub>14</sub> O <sub>3</sub>  | 12.7±0.5              |
| 7                                                                                | 6,7-Dihydroxylicustilide                       | 224.1049       | C <sub>12</sub> H <sub>16</sub> O <sub>4</sub>  | 10.9±1.1              |
| 8                                                                                | Senkyunolide A                                 | 192.1150       | C <sub>12</sub> H <sub>16</sub> O <sub>2</sub>  | 4.8±2.6               |
| 9                                                                                | Senkyunolide J                                 | 226.1205       | C <sub>12</sub> H <sub>18</sub> O <sub>4</sub>  | 3.4±0.4               |
| 10                                                                               | 4-Hydroxy-3- <i>n</i> -butylphthalide          | 206.0943       | C <sub>12</sub> H <sub>14</sub> O <sub>3</sub>  | 2.4±0.3               |
| <i>Constituents originating from the component herb Chishao only</i>             |                                                |                |                                                 |                       |
| 11                                                                               | Mudanpioside F                                 | 344.1471       | C <sub>16</sub> H <sub>24</sub> O <sub>8</sub>  | 5.8±1.0               |
| 12                                                                               | 1- <i>O</i> -β-D-Glucopyranosyl-Paeonisuffrone | 360.1420       | C <sub>16</sub> H <sub>24</sub> O <sub>9</sub>  | 1.6±0.5               |
| 13                                                                               | Desbenzoylpaeoniflorin                         | 376.1369       | C <sub>16</sub> H <sub>24</sub> O <sub>10</sub> | 22.1±13.7             |
| 14                                                                               | Albiflorin                                     | 480.1632       | C <sub>23</sub> H <sub>28</sub> O <sub>11</sub> | 102.4±27.6            |
| 15                                                                               | Paeoniflorin                                   | 480.1632       | C <sub>23</sub> H <sub>28</sub> O <sub>11</sub> | 2470±142.8            |
| 16                                                                               | Oxypaeoniflorin                                | 496.1581       | C <sub>23</sub> H <sub>28</sub> O <sub>12</sub> | 112.9±7.6             |
| 17                                                                               | Oxypaeoniflorin isomer                         | 496.1581       | C <sub>23</sub> H <sub>28</sub> O <sub>12</sub> | 4.0±0.8               |
| 18                                                                               | Ortho-oxypaeoniflorin                          | 496.1581       | C <sub>23</sub> H <sub>28</sub> O <sub>12</sub> | 4.3±0.7               |
| 19                                                                               | Mudanpioside E                                 | 526.1686       | C <sub>24</sub> H <sub>30</sub> O <sub>13</sub> | 11.3±1.1              |
| 20                                                                               | 6'- <i>O</i> -Galloyl-desbenzoylpaeoniflorin   | 528.1479       | C <sub>23</sub> H <sub>28</sub> O <sub>14</sub> | 1.3±0.5               |
| 21                                                                               | Benzoypaeoniflorin                             | 584.1894       | C <sub>30</sub> H <sub>32</sub> O <sub>12</sub> | 58.3±6.8              |

|    |                                                  |          |                                                 |           |
|----|--------------------------------------------------|----------|-------------------------------------------------|-----------|
| 22 | Benzoyloxypaeoniflorin                           | 600.1843 | C <sub>30</sub> H <sub>32</sub> O <sub>13</sub> | 1.9±0.2   |
| 23 | Mudanpioside C                                   | 600.1843 | C <sub>30</sub> H <sub>32</sub> O <sub>13</sub> | 1.6±0.4   |
| 24 | Mudanpioside J                                   | 630.1949 | C <sub>31</sub> H <sub>34</sub> O <sub>14</sub> | 2.0±0.3   |
| 25 | Galloylpaeoniflorin                              | 632.1741 | C <sub>30</sub> H <sub>32</sub> O <sub>15</sub> | 56.0±13.7 |
| 26 | Isomer of galloylpaeoniflorin or galloylbiflorin | 632.1741 | C <sub>30</sub> H <sub>32</sub> O <sub>15</sub> | 7.2±1.5   |
| 27 | Isomer of galloylpaeoniflorin or galloylbiflorin | 632.1741 | C <sub>30</sub> H <sub>32</sub> O <sub>15</sub> | 2.0±0.6   |
| 28 | Galloxyypaeoniflorin                             | 648.1690 | C <sub>30</sub> H <sub>32</sub> O <sub>16</sub> | 2.4±0.4   |

*Constituents originating from the component herb Danshen only*

|    |                              |       |                                                 |            |
|----|------------------------------|-------|-------------------------------------------------|------------|
| 29 | Protocatechuic aldehyde      | 138.0 | C <sub>7</sub> H <sub>6</sub> O <sub>3</sub>    | 139.3±28.7 |
| 30 | Protocatechuic acid          | 154.0 | C <sub>7</sub> H <sub>6</sub> O <sub>4</sub>    | 14.4±1.8   |
| 31 | Tanshinol                    | 198.1 | C <sub>9</sub> H <sub>10</sub> O <sub>5</sub>   | 66.4±15.5  |
| 32 | Salvianolic acid G           | 340.1 | C <sub>18</sub> H <sub>12</sub> O <sub>7</sub>  | 0.1±0.0    |
| 33 | Rosmarinic acid              | 360.1 | C <sub>18</sub> H <sub>16</sub> O <sub>8</sub>  | 40.4±6.3   |
| 34 | Salvianic acid C             | 378.1 | C <sub>18</sub> H <sub>18</sub> O <sub>9</sub>  | 0.3±0.0    |
| 35 | Salvianic acid C isomer      | 378.1 | C <sub>18</sub> H <sub>18</sub> O <sub>9</sub>  | 0.3±0.0    |
| 36 | Salvianolic acid D           | 418.1 | C <sub>20</sub> H <sub>18</sub> O <sub>10</sub> | 0.8±0.3    |
| 37 | Isosalvianolic acid C        | 492.1 | C <sub>26</sub> H <sub>20</sub> O <sub>10</sub> | 36.0±6.2   |
| 38 | Salvianolic acid C           | 492.1 | C <sub>26</sub> H <sub>20</sub> O <sub>10</sub> | 3.7±0.9    |
| 39 | Salvianolic acid A           | 494.1 | C <sub>26</sub> H <sub>22</sub> O <sub>10</sub> | 2.7±0.4    |
| 40 | Salviaflaside                | 522.1 | C <sub>24</sub> H <sub>26</sub> O <sub>13</sub> | 0.8±0.1    |
| 41 | Lithospermic acid            | 538.1 | C <sub>27</sub> H <sub>22</sub> O <sub>12</sub> | 1.2±0.2    |
| 42 | Salvianolic acid J           | 538.1 | C <sub>27</sub> H <sub>22</sub> O <sub>12</sub> | 1.9±0.3    |
| 43 | Salvianolic acid B           | 718.1 | C <sub>36</sub> H <sub>30</sub> O <sub>16</sub> | 23.9±3.1   |
| 44 | Salvianolic acid E           | 718.1 | C <sub>36</sub> H <sub>30</sub> O <sub>16</sub> | 1.3±0.3    |
| 45 | 4-Methoxylsalvianolic acid B | 732.2 | C <sub>37</sub> H <sub>32</sub> O <sub>16</sub> | 0.1±0.0    |

*Constituents originating from the component herb Honghua only*

|    |                   |         |                                                 |          |
|----|-------------------|---------|-------------------------------------------------|----------|
| 46 | Saffloquinoside D | 612.169 | C <sub>27</sub> H <sub>32</sub> O <sub>16</sub> | 36.7±3.2 |
|----|-------------------|---------|-------------------------------------------------|----------|

|    |                                                                            |           |                                                 |            |
|----|----------------------------------------------------------------------------|-----------|-------------------------------------------------|------------|
| 47 | Saffloquinoside C                                                          | 612.169   | C <sub>27</sub> H <sub>32</sub> O <sub>16</sub> | 30.0±2.7   |
| 48 | Hydroxysafflor yellow A                                                    | 612.169   | C <sub>27</sub> H <sub>32</sub> O <sub>16</sub> | 751.2±39.5 |
| 49 | Safflomin C                                                                | 614.1636  | C <sub>30</sub> H <sub>30</sub> O <sub>14</sub> | 11.3±1.5   |
| 50 | Saffloquinoside E                                                          | 614.1636  | C <sub>30</sub> H <sub>30</sub> O <sub>14</sub> | 6.7±1.1    |
| 51 | Carthamin                                                                  | 910.2168  | C <sub>43</sub> H <sub>42</sub> O <sub>22</sub> | 0.1±0.0    |
| 52 | Anhydrosafflor yellow B                                                    | 1044.2747 | C <sub>48</sub> H <sub>52</sub> O <sub>26</sub> | 3.6±1.2    |
| 53 | Kaempferol                                                                 | 286.0477  | C <sub>15</sub> H <sub>10</sub> O <sub>6</sub>  | 1.0±0.2    |
| 54 | Kaempferol 3-glucoside                                                     | 448.1006  | C <sub>21</sub> H <sub>20</sub> O <sub>11</sub> | 9.0±1.3    |
| 55 | Kaempferol 3-rha-(1-6)-glucoside                                           | 594.1585  | C <sub>27</sub> H <sub>30</sub> O <sub>15</sub> | 45.6±15.4  |
| 56 | Kaempferol 3-glc-(1-2)-glucoside                                           | 610.1534  | C <sub>27</sub> H <sub>30</sub> O <sub>16</sub> | 14.9±2.5   |
| 57 | 3-Glc-kaempferol 7-glucuronide<br>or 6-Glc-6-hydroxyapigenin 7-glucuronide | 624.1326  | C <sub>27</sub> H <sub>28</sub> O <sub>17</sub> | 12.2±5.6   |
| 58 | 6-Hydroxykaempferol 7-glucoside                                            | 464.0955  | C <sub>21</sub> H <sub>20</sub> O <sub>12</sub> | 11.2±6.5   |
| 59 | 6-Hydroxykaempferol 3-glucoside                                            | 464.0955  | C <sub>21</sub> H <sub>20</sub> O <sub>12</sub> | 0.3±0.1    |
| 60 | 6-Hydroxykaempferol 3-rha-(1-6)-glucoside                                  | 610.1534  | C <sub>27</sub> H <sub>30</sub> O <sub>16</sub> | 3.6±2.0    |
| 61 | 6-Hydroxykaempferol 3,6-diglucoside                                        | 626.1483  | C <sub>27</sub> H <sub>30</sub> O <sub>17</sub> | 2.2±1.1    |
| 62 | 6-Hydroxykaempferol 6,7-diglucoside                                        | 626.1483  | C <sub>27</sub> H <sub>30</sub> O <sub>17</sub> | 0.9±0.1    |
| 63 | 6-Glc-6-Hydroxykaempferol<br>3-rha-(1-6)-glucoside                         | 772.2062  | C <sub>33</sub> H <sub>40</sub> O <sub>21</sub> | 9.0±4.2    |
| 64 | 6-Hydroxykaempferol<br>7-(3,6-diglc)-glucoside                             | 788.2011  | C <sub>33</sub> H <sub>40</sub> O <sub>22</sub> | 7.0±2.2    |
| 65 | 6-Hydroxykaempferol<br>7-(3,6-diglc)-glucuronide                           | 802.1804  | C <sub>33</sub> H <sub>38</sub> O <sub>23</sub> | 1.5±0.6    |
| 66 | Quercetin                                                                  | 302.0427  | C <sub>15</sub> H <sub>10</sub> O <sub>7</sub>  | 0.7±0.1    |
| 67 | Quercetin 3-glucoside                                                      | 464.0955  | C <sub>21</sub> H <sub>20</sub> O <sub>12</sub> | 5.6±1.3    |
| 68 | Quercetin 3-rha-(1-6)-glucoside                                            | 610.1534  | C <sub>27</sub> H <sub>30</sub> O <sub>16</sub> | 10.0±3.3   |
| 69 | 3-Rha-quercetin 7-glucuronide                                              | 624.1326  | C <sub>27</sub> H <sub>28</sub> O <sub>17</sub> | 0.7±0.3    |
| 70 | Quercetin 3,7-diglucoside                                                  | 626.1483  | C <sub>27</sub> H <sub>30</sub> O <sub>17</sub> | 22.5±7.5   |
| 71 | Eriodictyol                                                                | 288.0634  | C <sub>15</sub> H <sub>12</sub> O <sub>6</sub>  | 0.8±0.1    |

|    |                                                 |          |                                                 |           |
|----|-------------------------------------------------|----------|-------------------------------------------------|-----------|
| 72 | Neocarthamin                                    | 450.1162 | C <sub>21</sub> H <sub>22</sub> O <sub>11</sub> | 10.6±2.1  |
| 73 | Neocarthamin isomer                             | 450.1162 | C <sub>21</sub> H <sub>22</sub> O <sub>11</sub> | 13.8±2.2  |
| 74 | 5,6,7,4'-Tetrahydroxyflavone<br>6,7-diglucoside | 612.169  | C <sub>27</sub> H <sub>32</sub> O <sub>16</sub> | 47.3±11.5 |
| 75 | Apigenin                                        | 270.0528 | C <sub>15</sub> H <sub>10</sub> O <sub>5</sub>  | 0.4±0.1   |
| 76 | 6-Hydroxyapigenin                               | 286.0477 | C <sub>15</sub> H <sub>10</sub> O <sub>6</sub>  | 0.7±0.2   |
| 77 | Luteolin                                        | 286.0477 | C <sub>15</sub> H <sub>10</sub> O <sub>6</sub>  | 0.3±0.0   |
| 78 | Luteolin 7-glucoside                            | 448.1006 | C <sub>21</sub> H <sub>20</sub> O <sub>11</sub> | 0.9±0.2   |
| 79 | Scutellarin                                     | 462.0798 | C <sub>21</sub> H <sub>18</sub> O <sub>12</sub> | 2.5±1.5   |
| 80 | Safflochalconeside                              | 432.1056 | C <sub>21</sub> H <sub>20</sub> O <sub>10</sub> | 0.1±0.0   |

*Constituents originating from multiple component herbs of XueBiJing*

|    |                           |          |                                                               |             |
|----|---------------------------|----------|---------------------------------------------------------------|-------------|
| 81 | p-Coumaric acid           | 164.0473 | C <sub>9</sub> H <sub>8</sub> O <sub>3</sub>                  | 69.0±23.1   |
| 82 | 4-Glucoxyloxybenzoic acid | 300.0845 | C <sub>13</sub> H <sub>16</sub> O <sub>8</sub>                | 20.9±2.3    |
| 83 | p-Hydroxybenzoic acid     | 138.0317 | C <sub>7</sub> H <sub>6</sub> O <sub>3</sub>                  | 52.1±7.0    |
| 84 | Chlorogenic acid          | 354.0951 | C <sub>16</sub> H <sub>18</sub> O <sub>9</sub>                | 13.5±2.3    |
| 85 | Caffeic acid              | 180.0423 | C <sub>9</sub> H <sub>8</sub> O <sub>4</sub>                  | 43.2±11.8   |
| 86 | Butanedioic acid          | 118.0266 | C <sub>4</sub> H <sub>6</sub> O <sub>4</sub>                  | 118.3±34.0  |
| 87 | Phenylalanine             | 165.0790 | C <sub>9</sub> H <sub>11</sub> NO <sub>2</sub>                | 256.5±28.6  |
| 88 | Uridine                   | 244.0695 | C <sub>9</sub> H <sub>12</sub> N <sub>2</sub> O <sub>6</sub>  | 87.3±13.6   |
| 89 | Cytidine                  | 243.0855 | C <sub>9</sub> H <sub>13</sub> N <sub>3</sub> O <sub>5</sub>  | 1.1±0.1     |
| 90 | Adenosine                 | 267.0968 | C <sub>10</sub> H <sub>13</sub> N <sub>5</sub> O <sub>4</sub> | 35.5±17.1   |
| 91 | Guanosine                 | 283.0917 | C <sub>10</sub> H <sub>13</sub> N <sub>5</sub> O <sub>5</sub> | 58.5±10.3   |
| 92 | Adenine                   | 135.0545 | C <sub>5</sub> H <sub>5</sub> N <sub>5</sub>                  | 23.6±4.6    |
| 93 | Thymine                   | 126.0429 | C <sub>5</sub> H <sub>6</sub> N <sub>2</sub> O <sub>2</sub>   | 3.3±1.4     |
| 94 | Uracil                    | 112.0273 | C <sub>4</sub> H <sub>4</sub> N <sub>2</sub> O <sub>2</sub>   | 48.6±9.8    |
| 95 | benzoic acid              | 122.0368 | C <sub>7</sub> H <sub>6</sub> O <sub>2</sub>                  | 767.0±133.9 |
| 96 | gallic acid               | 170.0215 | C <sub>7</sub> H <sub>6</sub> O <sub>5</sub>                  | 41.1±15.8   |
| 97 | 1'-O-benzoylsucrose       | 446.1424 | C <sub>19</sub> H <sub>26</sub> O <sub>12</sub>               | 53.0±24.1   |
| 98 | 1'-O-galloylsucrose       | 494.1272 | C <sub>19</sub> H <sub>26</sub> O <sub>15</sub>               | 3.2±1.6     |



|     |                              |          |                                                 |            |
|-----|------------------------------|----------|-------------------------------------------------|------------|
| 99  | 6'- <i>O</i> -galloylsucrose | 494.1272 | C <sub>19</sub> H <sub>26</sub> O <sub>15</sub> | 3.0±1.6    |
| 100 | Trigalloyl glucose           | 636.0963 | C <sub>27</sub> H <sub>24</sub> O <sub>18</sub> | 42±17.2    |
| 101 | tetragalloyl glucose         | 788.1072 | C <sub>34</sub> H <sub>28</sub> O <sub>22</sub> | 8.3±5.1    |
| 102 | tetragalloyl glucose isomer  | 788.1072 | C <sub>34</sub> H <sub>28</sub> O <sub>22</sub> | 2.5±0.8    |
| 103 | (+)-catechin                 | 290.0790 | C <sub>15</sub> H <sub>14</sub> O <sub>6</sub>  | 1.9±2.1    |
| 104 | Ferulic acid                 | 194.0579 | C <sub>10</sub> H <sub>10</sub> O <sub>4</sub>  | 117.0±24.4 |

XueBiJing, an intravenous preparation approved by the China Food and Drug Administration (China FDA) in 2004, has been incorporated into routine sepsis care in China. XueBiJing is prepared from a combination of *Carthamus tinctorius* flowers (Honghua in Chinese), *Paeonia lactiflora* roots (Chishao), *Ligusticum chuanxiong* rhizomes (Chuanxiong), *Angelica sinensis* roots (Danggui), and *Salvia miltiorrhiza* roots (Danshen).

Analysis of chemical composition of XueBiJing was based on liquid chromatography-mass spectrometry by Professor Chuan Li's laboratory at Shanghai Institute of Materia Medica, Chinese Academy of Sciences (Shanghai, China). A part of these results has been published, while details of the others are pending publication elsewhere.

## References

- (1) Cheng C., Lin J-Z., Li L., Yang J-L., Jia W-W., Huang Y-H., Du F-F., Wang F-Q., Li M-J., Li Y-F., Xu F., Zhang N-T., Olaleye O.E., Sun Y., Li J., Sun C-H., Zhang G-P., Li C. (2016) Pharmacokinetics and disposition of monoterpene glycosides derived from *Paeonia lactiflora* roots (Chishao) after intravenous dosing of antiseptic XueBiJing injection in human subjects and rats. *Acta Pharmacol. Sin.* 37: 530–544.
- (2) Li X-X., Cheng C., Wang F-Q., Huang Y-H., Jia W-W., Olaleye O.E., Li M-J., Li Y-F., Li C. (2016) Pharmacokinetics of catechols in human subjects intravenously receiving XueBiJing injection, an emerging antiseptic herbal medicine. *Drug Metab. Pharmacokinet.* 31: 95–98.
- (3) Zhang N-T., Cheng C., Olaleye O.E., Sun Y., Li L., Huang Y-H., Du F-F., Yang J-L., Wang F-Q., Shi Y-H., Xu F., Li Y-F., Wen Q., Zhang N-X., Li C. (2018) Pharmacokinetics-based identification of potential therapeutic phthalides from XueBiJing, a Chinese herbal injection used in sepsis management. *Drug Metab. Dispos.* 46: 823–834.
