# Supplementary material for: XueBiJing Injection Versus Placebo for Critically Ill Patients With Severe Community-Acquired Pneumonia: A Randomized Controlled Trial
Source: PubMed Central journal article supplement — Crit Care Med. 2019 Aug 15;47(9):e735–43. doi: 10.1097/CCM.0000000000003842 (PMC6727951; doi:10.1097/ccm.0000000000003842), 2019-08-15
Supplement: ccm-47-e735-s002.pdf [file ccm-47-e735-s002.pdf]

## Supplemental Content 2

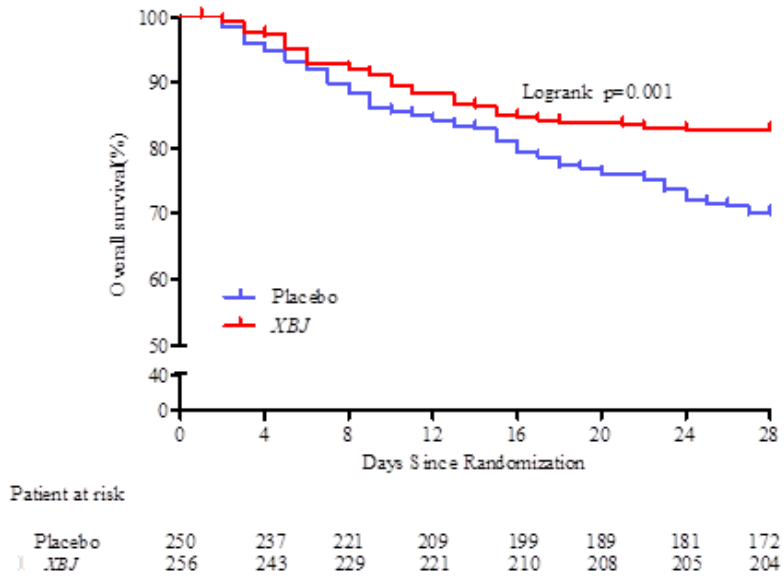

**Figure S1. Kaplan-Meier analysis of the effect of XueBijing on 28-day survival (506 patients with pneumonia severity index class IV–V)**

**TABLE S1. Microbiologic identification for XueBiJing group vs placebo group using descriptive statistics for the intention-to-treat populations**

|                              |           | <b>XueBiJing<br/>(n=334)</b> | <b>Placebo<br/>(n=341)</b> | <b>Total</b> | <b><i>P value</i></b> |
|------------------------------|-----------|------------------------------|----------------------------|--------------|-----------------------|
| Microbiologic identification | Yes (%)   | 144(43.11%)                  | 153(44.87%)                | 297(44.00%)  | 0.646                 |
| Etiology                     | Known (%) | 85(59.03%)                   | 104(67.97%)                | 189(63.64%)  | 0.109                 |
| Sensitivity tests            | Known (%) | 42(49.41%)                   | 42(40.38%)                 | 84(44.44%)   | 0.214                 |

**Table S2. Comparison of the secondary outcomes for the intention-to-treat populations**

|                                                            | XueBiJing (n=334) | Placebo (n=341)  | Between-group different (95% CI) | P value |
|------------------------------------------------------------|-------------------|------------------|----------------------------------|---------|
| <b>PSI score, mean(SD)</b>                                 |                   |                  |                                  |         |
| Day 4                                                      | 93.14(28.67)      | 100.01(29.24)    | -8.73(-12.87,-4.59)              | <0.0001 |
| Day 8                                                      | 87.91(29.90)      | 96.35(30.61)     | -10.05(-14.67,-5.42)             | <0.0001 |
| <b>PSI Improvement Rate</b>                                |                   |                  |                                  |         |
| Day 4                                                      | 194/307(63.2%)    | 141/305(44.8%)   | 18.1% (10.5%-25.7%)              | <0.0001 |
| <b>Sequential Organ Failure Assessment Score, mean(SD)</b> |                   |                  |                                  |         |
| Day 4                                                      | 4.52(2.94)        | 5.01(2.89)       | -0.58(-0.90,-0.25)               | 0.0005  |
| Day 8                                                      | 3.65(3.01)        | 4.44(2.95)       | -0.78(-1.18,-0.39)               | 0.0001  |
| <b>Sequential Organ Failure Assessment high risk Rate</b>  |                   |                  |                                  |         |
| Day 4                                                      | 194/308 (62.99%)  | 218/315 (69.21%) | -6.2%(-13.2%, 0.8%)              | 0.098   |
| Day 8                                                      | 142/301 (47.18%)  | 192/306 (62.75%) | -15.6%(-23.7%,-7.5%)             | 0.0001  |
| <b>APACHE II score, mean (SD)</b>                          |                   |                  |                                  |         |
| Day 4                                                      | 10.40(5.95)       | 12.00(6.09)      | -1.59(-2.35,-0.83)               | <0.0001 |
| Day 8                                                      | 9.19(6.46)        | 11.12(6.25)      | -1.88(-2.79,-0.99)               | <0.0001 |
| <b>APACHE II improvement Rate</b>                          |                   |                  |                                  |         |
| Day 4                                                      | 22/308 (7.14%)    | 40/316 (12.66%)  | -5.6% (-9.9%,-1.2%)              | 0.022   |
| Day 8                                                      | 23/301 (7.64%)    | 35/306 (11.44%)  | -3.8% (-8.4%, 0.8%)              | 0.109   |
| <b>SIRS improvement Rate</b>                               |                   |                  |                                  |         |
| DAY 4                                                      | 127/310 (40.97%)  | 91/315 (28.89%)  | 12.1% (4.3%-19.9%)               | 0.002   |
| DAY 8                                                      | 166/301 (55.15%)  | 142/305 (46.56%) | 8.6% (1.0%-16.2%)                | 0.031   |
| <b>Lung Injury Score, mean(SD)</b>                         |                   |                  |                                  |         |
| Day 4                                                      | 6.81(2.43)        | 7.30(2.64)       | -0.43(-0.91,0.05)                | 0.083   |
| Day 8                                                      | 6.81(2.35)        | 7.49(2.88)       | -0.34(-0.98,0.30)                | 0.295   |
| <b>Lung Injury Score improvement Rate</b>                  |                   |                  |                                  |         |

|                                                         |                  |                  |                        |        |
|---------------------------------------------------------|------------------|------------------|------------------------|--------|
| Day 4                                                   | 100/166 (60.24%) | 87/175 (49.71%)  | 9.9% (1.0%-20.7%)      | 0.044  |
| Day 8                                                   | 97/151 (64.24%)  | 91/167 (54.49%)  | 10.5% (0.0%-21.3%)     | 0.049  |
| <b>MODS score, mean (SD)</b>                            |                  |                  |                        |        |
| Day 4                                                   | 5.35(3.41)       | 5.36(2.97)       | -0.01(-0.89,0.88)      | 0.990  |
| Day 8                                                   | 4.18(3.81)       | 4.86(3.31)       | 0.69(-1.71,0.34)       | 0.189  |
| <b>MODS score improvement Rate</b>                      |                  |                  |                        |        |
| Day 4                                                   | 47/90(52.22%)    | 40/110(36.36%)   | 14.8% (0.7%-29.0%)     | 0.028  |
| Day 8                                                   | 62/80 (77.50%)   | 54/106 (50.94%)  | 26.3% (13.2%-39.4%)    | 0.0003 |
| <b>Body temperature, mean (SD)</b>                      |                  |                  |                        |        |
| Day 4                                                   | 37.39(0.78)      | 37.46(0.82)      | -0.08(-0.19,0.04)      | 0.184  |
| Day 8                                                   | 37.18(0.69)      | 37.30(0.80)      | -0.12(-0.23,0.00)      | 0.046  |
| <b>Oxygenation index, mean (SD)</b>                     |                  |                  |                        |        |
| Day 4                                                   | 246.82(98.86)    | 229.69(96.55)    | 17.34(2.16,32.52)      | 0.025  |
| Day 8                                                   | 269.90(105.76)   | 251.51(104.02)   | 15.54(-1.04,32.12)     | 0.066  |
| <b>Procalcitonin</b>                                    |                  |                  |                        |        |
| Day 4                                                   | 5.54(19.49)      | 4.90(17.95)      | 1.97(-0.91,4.86)       | 0.180  |
| Day 8                                                   | 2.54(7.41)       | 4.69(26.42)      | -1.85(-5.41,1.71)      | 0.309  |
| <b>C-reactive protein</b>                               |                  |                  |                        |        |
| Day 4                                                   | 59.91(67.23)     | 64.92(63.25)     | -3.93(-13.01,5.14)     | 0.396  |
| Day 8                                                   | 38.53(51.46)     | 48.17(78.33)     | -7.59(-18.43,3.24)     | 0.170  |
| <b>D-dimer</b>                                          |                  |                  |                        |        |
| Day 4                                                   | 3475.39(5918.51) | 2300.75(3355.61) | 854.30(123.14,1585.45) | 0.023  |
| Day 8                                                   | 2877.76(4355.08) | 2416.28(4022.42) | 259.13(-389.74,908.01) | 0.434  |
| <b>Total duration of antibiotic use, days, mean(SD)</b> | 7.55(3.07)       | 7.65(3.09)       | -0.09(-0.56,0.37)      | 0.678  |

**TABLE S3. Adverse events and Clinically Significant Laboratory Abnormalities**

| Event                                           |                                       | Placebo (n=341), n (%) |           | XueBiJing (n=334), n (%) |           |
|-------------------------------------------------|---------------------------------------|------------------------|-----------|--------------------------|-----------|
| Clinically Significant Laboratory Abnormalities | Low red blood cell count              | 16                     | 16(4.69%) | 22                       | 22(6.59%) |
|                                                 | High red blood cell count             | 3                      | 3(0.88%)  | 1                        | 1(0.30%)  |
|                                                 | Low hemoglobin count                  | 27                     | 27(7.92%) | 22                       | 22(6.59%) |
|                                                 | High hemoglobin count                 | 2                      | 2(0.59%)  | 1                        | 1(0.30%)  |
|                                                 | Low white blood cell count            | 4                      | 4(1.17%)  | 3                        | 3(0.90%)  |
|                                                 | High white blood cell count           | 18                     | 18(5.28%) | 18                       | 18(5.39%) |
|                                                 | Low platelet count                    | 10                     | 10(2.93%) | 8                        | 8(2.40%)  |
|                                                 | High platelet count                   | 9                      | 9(2.64%)  | 6                        | 6(1.80%)  |
|                                                 | Low hematocrit levels                 | 11                     | 11(3.23%) | 9                        | 9(2.69%)  |
|                                                 | High hematocrit levels                | 1                      | 1(0.29%)  | 0                        | 0(0.00%)  |
|                                                 | Abnormal alanine aminotransferase     | 2                      | 2(0.59%)  | 0                        | 0(0.00%)  |
|                                                 | Elevated alanine aminotransferase     | 31                     | 31(9.09%) | 30                       | 30(8.98%) |
|                                                 | Decreased aspartate amino transferase | 1                      | 1(0.29%)  | 3                        | 3(0.90%)  |
|                                                 | Elevated aspartate amino transferase  | 18                     | 18(5.28%) | 22                       | 22(6.59%) |
|                                                 | Decreased total bilirubin             | 1                      | 1(0.29%)  | 2                        | 2(0.60%)  |
|                                                 | Elevated total bilirubin              | 12                     | 12(3.52%) | 9                        | 9(2.69%)  |
|                                                 | Decreased blood urea nitrogen         | 2                      | 2(0.59%)  | 1                        | 1(0.30%)  |
|                                                 | Elevated blood urea nitrogen          | 20                     | 20(5.87%) | 20                       | 20(5.99%) |
|                                                 | Decreased serum creatinine            | 8                      | 8(2.35%)  | 5                        | 5(1.50%)  |
|                                                 | Elevated serum creatinine             | 11                     | 11(3.23%) | 9                        | 9(2.69%)  |
|                                                 | Elevated blood glucose                | 15                     | 15(4.40%) | 19                       | 19(5.69%) |
|                                                 | Decreased K <sup>+</sup>              | 11                     | 11(3.23%) | 7                        | 7(2.10%)  |
|                                                 | Elevated K <sup>+</sup>               | 1                      | 1(0.29%)  | 2                        | 2(0.60%)  |
|                                                 | Elevated Na <sup>+</sup>              | 5                      | 5(1.47%)  | 4                        | 4(1.20%)  |

| Event                                                                 |                                                 | Placebo (n=341), n (%) |             | XueBiJing (n=334), n (%) |             |
|-----------------------------------------------------------------------|-------------------------------------------------|------------------------|-------------|--------------------------|-------------|
|                                                                       | Decreased Na <sup>+</sup>                       | 4                      | 4(1.17%)    | 2                        | 2(0.60%)    |
|                                                                       | Decreased plasma fibrinogen                     | 3                      | 3(0.88%)    | 2                        | 2(0.60%)    |
|                                                                       | Elevated plasma fibrinogen                      | 13                     | 13(3.81%)   | 8                        | 8(2.40%)    |
|                                                                       | Decreased prothrombin time                      | 0                      | 0(0.00%)    | 1                        | 1(0.30%)    |
|                                                                       | Elevated prothrombin time                       | 11                     | 11(3.23%)   | 4                        | 4(1.20%)    |
|                                                                       | Decreased activated partial thromboplastin time | 1                      | 1(0.29%)    | 0                        | 0(0.00%)    |
|                                                                       | Elevated activated partial thromboplastin time  | 8                      | 8(2.35%)    | 3                        | 3(0.90%)    |
|                                                                       | Elevated fibrin D-dimer                         | 6                      | 6(1.76%)    | 5                        | 5(1.50%)    |
|                                                                       | Elevated C reactive protein                     | 1                      | 1(0.29%)    | 0                        | 0(0.00%)    |
|                                                                       | Elevated procalcitonin                          | 1                      | 1(0.29%)    | 0                        | 0(0.00%)    |
|                                                                       | Positive protein in urine                       | 1                      | 1(0.29%)    | 3                        | 3(0.90%)    |
|                                                                       | High urine white blood cell count               | 3                      | 3(0.88%)    | 3                        | 3(0.90%)    |
|                                                                       | High urine red blood cell count                 | 3                      | 3(0.88%)    | 3                        | 3(0.90%)    |
|                                                                       | Elevated urine glucose                          | 4                      | 4(1.17%)    | 2                        | 2(0.60%)    |
|                                                                       | Positive fecal occult blood test                | 1                      | 1(0.29%)    | 0                        | 0(0.00%)    |
|                                                                       | Total                                           | 299                    | 135(39.59%) | 259                      | 117(35.03%) |
| Musculoskeletal and connective tissue diseases                        | Pain in the upper limbs                         | 0                      | 0(0.00%)    | 1                        | 1(0.30%)    |
|                                                                       | Total                                           | 0                      | 0(0.00%)    | 1                        | 1(0.30%)    |
| Immune system diseases                                                | Allergic reactions                              | 0                      | 0(0.00%)    | 1                        | 1(0.30%)    |
|                                                                       | Total                                           | 0                      | 0(0.00%)    | 1                        | 1(0.30%)    |
| Skin and subcutaneous tissue diseases                                 | Erythema                                        | 1                      | 1(0.29%)    | 0                        | 0(0.00%)    |
|                                                                       | Total                                           | 1                      | 1(0.29%)    | 0                        | 0(0.00%)    |
| Systemic diseases and various responses at the site of administration | Shivering                                       | 1                      | 1(0.29%)    | 0                        | 0(0.00%)    |
|                                                                       | Total                                           | 1                      | 1(0.29%)    | 0                        | 0(0.00%)    |

| Event                               |                                   | Placebo (n=341), n (%) |          | XueBiJing (n=334), n (%) |          |
|-------------------------------------|-----------------------------------|------------------------|----------|--------------------------|----------|
| Gastrointestinal system diseases    | Upper digestive tract perforation | 1                      | 1(0.29%) | 0                        | 0(0.00%) |
|                                     | Total                             | 1                      | 1(0.29%) | 0                        | 0(0.00%) |
| Blood and lymphatic system diseases | Anemia                            | 2                      | 2(0.59%) | 0                        | 0(0.00%) |
|                                     | Total                             | 2                      | 2(0.59%) | 0                        | 0(0.00%) |
